# Supplementary material
Source: Springer Nature journal article supplement (https://www.springermedizin.de/resource/supplementary/12936_2010_1241_MOESM4_ESM.pdf/9549308)

*P. falciparum* density (pg/ml)

800  
600  
400  
200  
0

M

S1

S2

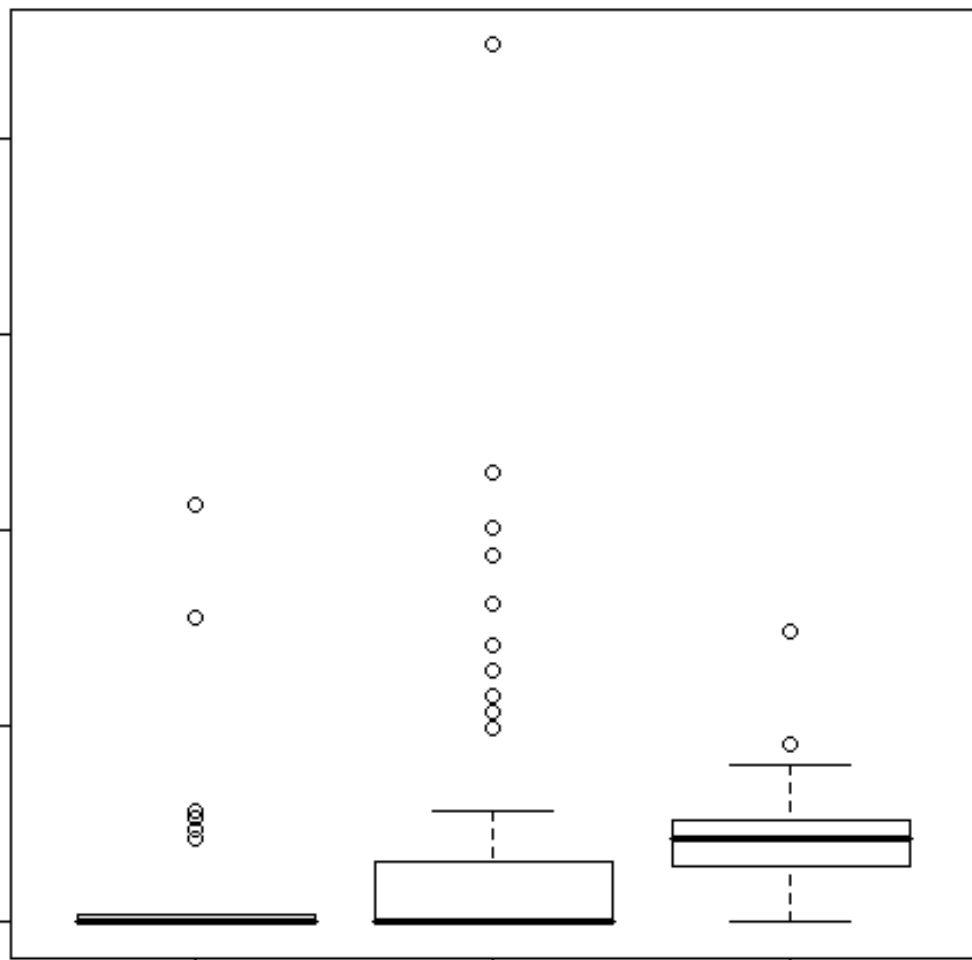

Supplement: MOESM4 [file 9549308]
